## Correction: Multidrug resistance transporter profile reveals MDR3 as a marker for stratification of blastemal Wilms tumour patients

**Lourdes Hontecillas-Prieto, Daniel J. Garcia-Dominguez, Diego Pascual Vaca, Rosa Garcia-Mejias, David Marcilla, Gema L. Ramirez-Villar, Carmen Saez, Enrique de Álava**

Copyright: Hontecillas-Prieto et al. This is an open-access article distributed under the terms of the Creative Commons Attribution License 3.0 (CC BY 3.0), which permits unrestricted use, distribution, and reproduction in any medium, provided the original author and source are credited.

**Present:** The affiliation information is incomplete.

**Correct:** Additional affiliation information is shown below. The publishers sincerely apologize for this oversight.

Original article: Oncotarget. 2017; 8:11173-11186. <https://doi.org/10.18632/oncotarget.14491>

**Lourdes Hontecillas-Prieto<sup>1,\*</sup>, Daniel J. Garcia-Dominguez<sup>1,\*</sup>, Diego Pascual Vaca<sup>2</sup>, Rosa Garcia-Mejias<sup>1</sup>, David Marcilla<sup>2</sup>, Gema L. Ramirez-Villar<sup>3</sup>, Carmen Saez<sup>1,2,\*\*</sup>, Enrique de Álava<sup>1,2,\*\*</sup>**

<sup>1</sup> Institute of Biomedicine of Seville (IBiS), Hospital Universitario Virgen del Rocío/CSIC/Universidad de Sevilla, CIBERONC. Seville, Spain

<sup>2</sup> Pathology Unit, Hospital Universitario Virgen del Rocío/CSIC/Universidad de Sevilla, CIBERONC. Seville, Spain

<sup>3</sup> Pediatric Oncology Unit, Hospital Universitario Virgen del Rocío/CSIC/Universidad de Sevilla, Seville, Spain

\* These authors contributed equally to this work as first authors

\*\* These authors contributed equally to this work as senior authors
